# Supplementary material for: Functionalized poly(arylene ether sulfone) containing hydroxyl units for the fabrication of durable, superhydrophobic oil/water separation membranes
Source: Royal Society of Chemistry journal article supplement (doi:10.1039/c9nr00621d), 2019-01-01
Supplement: c9nr00621d1.pdf [file c9nr00621d1.pdf]

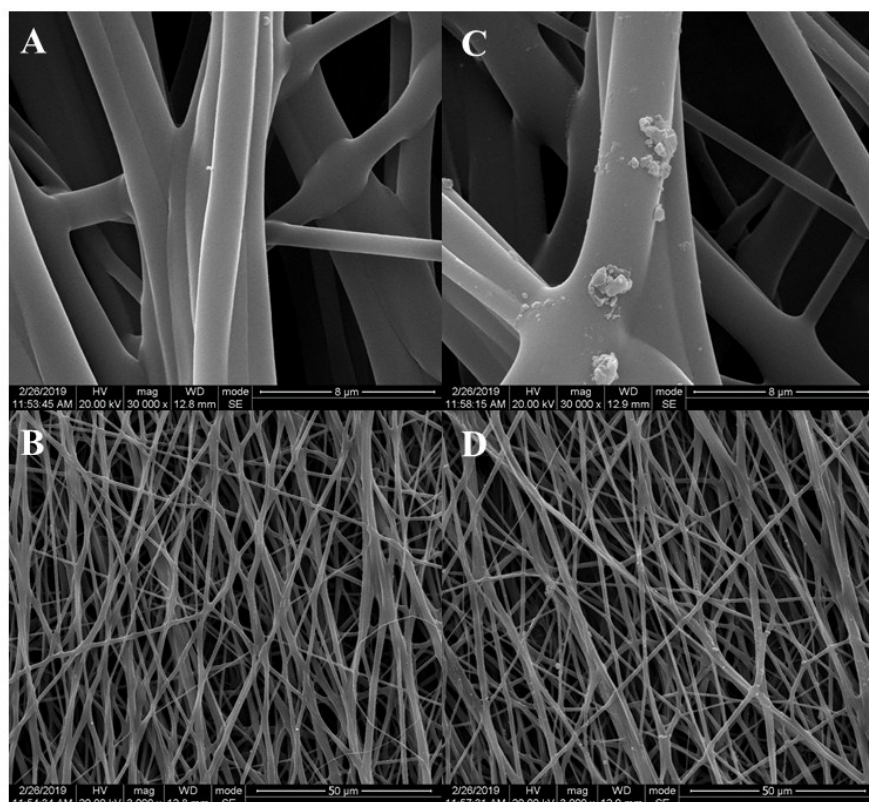

**Figure S1.** SEM images of PAES-OH fibrous membrane-20 wt%-15 kV [A and B, original membrane; C and D, membrane immersed in n-hexane after drying in vacuum oven].

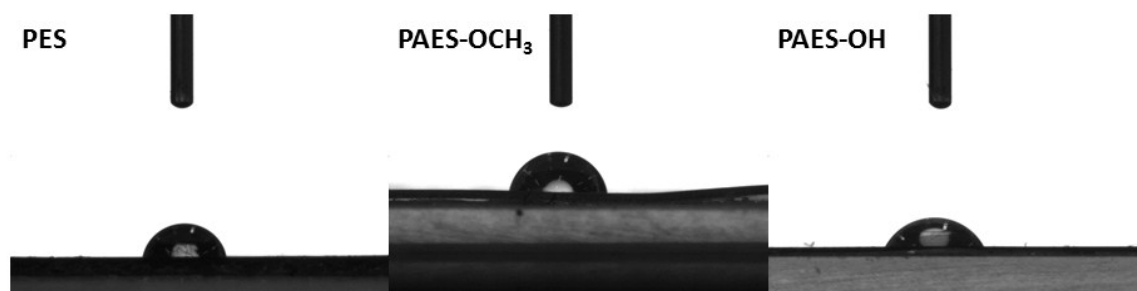

**Figure S2** The contact angle of dense film of PES, PAES-OCH<sub>3</sub>, and PAES-OH.

Table S1 Flux and rejection of fibrous PAES-OH-OTS membrane

| Samples                               | Flux (L/(m <sup>2</sup> h)) | Rejection (%) |
|---------------------------------------|-----------------------------|---------------|
| New Fibrous Membrane                  | 8760                        | 99.1          |
| Fibrous Membrane after<br>1 cycle     | 8340                        | 99.1          |
| Fibrous Membrane after<br>2 cycle     | 8070                        | 99.2          |
| New Fibrous Membrane<br>under 0.1 MPa | 12390                       | 87.2          |
| New Fibrous Membrane<br>under 0.2 MPa | 17450                       | 79.8          |
